# Supplementary material
Source: PubMed Central journal article supplement (PMC5077304)

Supplementary Figure 1. Distribution of urinary cadmium and dietary cadmium among participants.

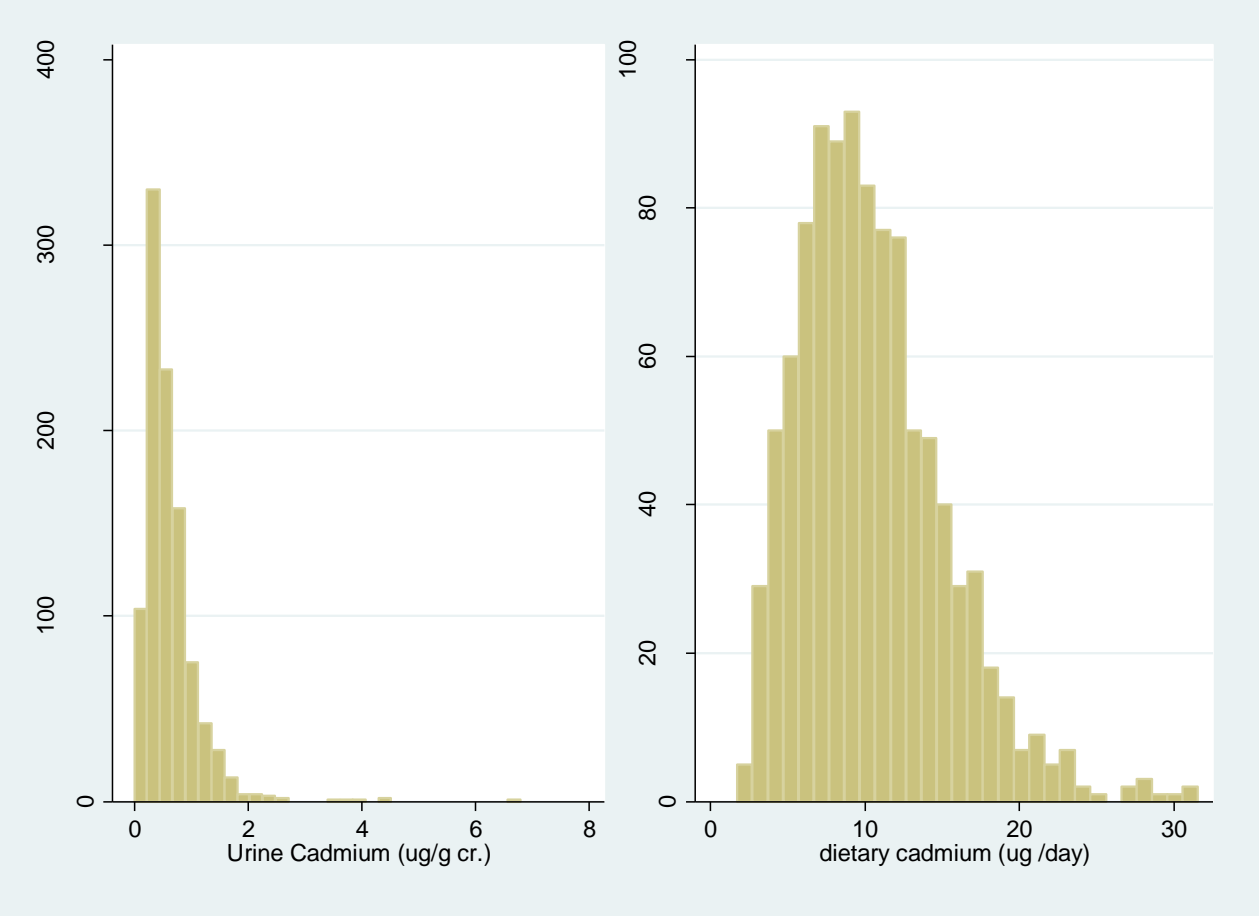

Supplement: NIHMS818687-supplement-supplement_1.pdf [file NIHMS818687-supplement-supplement_1.pdf]
